# Supplementary material for: Long-term outcomes among adults with Langerhans cell histiocytosis
Source: PubMed Central journal article supplement — Blood Adv. 2023 Sep 14;7(21):6568–78. doi: 10.1182/bloodadvances.2023010706 (PMC10641096; doi:10.1182/bloodadvances.2023010706), 2023-09-14

Supplementary Figure 1. Pattern of disease progression from diagnosis to last follow-up

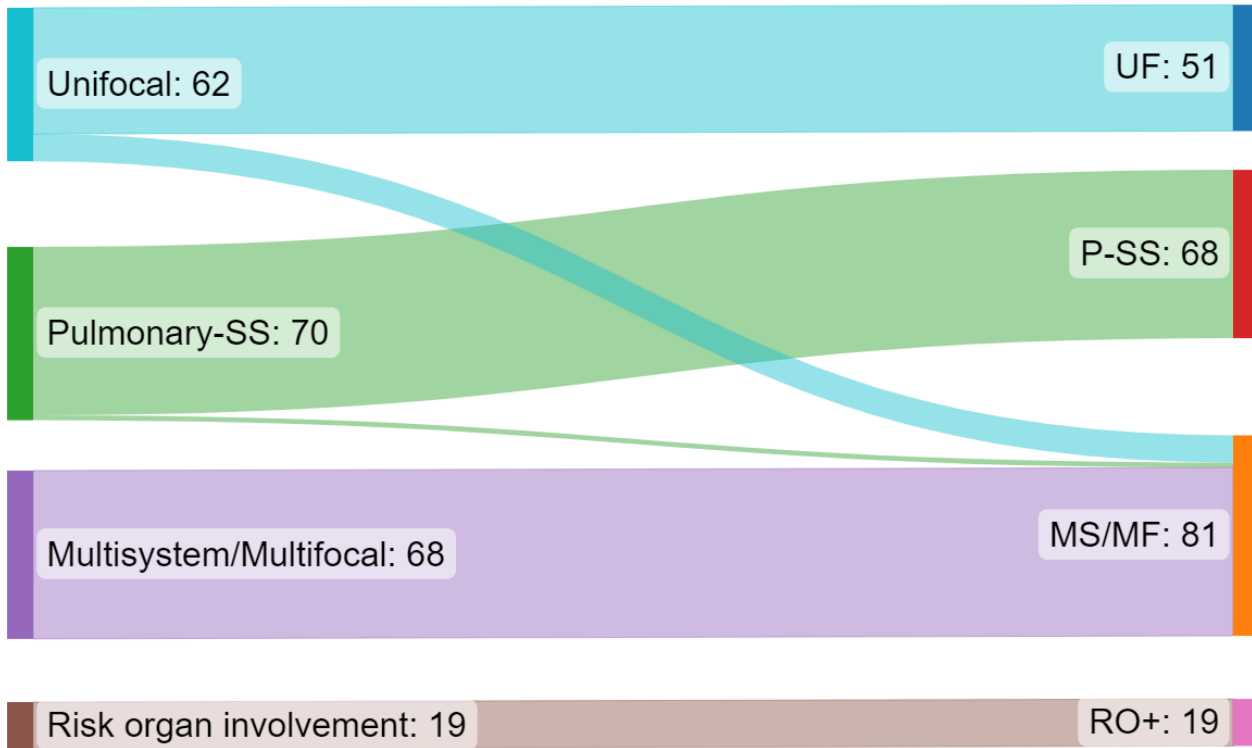

**Supplementary Table 1. Observed (O) and expected (E) number of deaths, and standardized mortality ratios (SMR) of adults with Langerhans cell histiocytosis as compared to US general population**

|                                         | <i>Total study years</i> | <i>O-Deaths</i> | <i>E-Deaths</i> | <i>SMR (95%CI)</i> |
|-----------------------------------------|--------------------------|-----------------|-----------------|--------------------|
| <b>Overall</b>                          | 1367                     | 35              | 13.1726         | 2.66 (1.78-3.54)   |
| <b>Age</b>                              |                          |                 |                 |                    |
| <55 years                               | 723                      | 11              | 1.8507          | 5.94 (2.43-9.45)   |
| ≥55 years                               | 644                      | 24              | 11.3219         | 2.12 (1.27-2.97)   |
| <b>Sex</b>                              |                          |                 |                 |                    |
| Female                                  | 785                      | 15              | 7.56887         | 1.98 (0.98-2.98)   |
| Male                                    | 582                      | 20              | 5.60369         | 3.57 (2.01-5.13)   |
| <b>Classification at last follow-up</b> |                          |                 |                 |                    |
| Multisystem                             | 528                      | 19              | 4.61084         | 4.12 (2.27-5.97)   |
| Single-system pulmonary                 | 473                      | 14              | 2.9795          | 4.7 (2.24-7.16)    |
| Single-system multifocal                | 9.                       | 0               | 2.51443         | 0                  |
| Unifocal                                | 273                      | 2               | 3.06778         | 0.65 (-0.25-1.55)  |

**Supplementary Table 2. Concomitant, secondary, and prior malignancies among adults with Langerhans cell histiocytosis**

| ID                                 | LCH BRAF Status                | Type                                                     | Additional prior malignancies & Notes         | Age at SPM Dx | Classification of LCH | RO+/- | Circumstance underlying identification of malignancy                   | LCH treatments                                                             |
|------------------------------------|--------------------------------|----------------------------------------------------------|-----------------------------------------------|---------------|-----------------------|-------|------------------------------------------------------------------------|----------------------------------------------------------------------------|
| <i>Second Primary Malignancies</i> |                                |                                                          |                                               |               |                       |       |                                                                        |                                                                            |
| 186                                | NE                             | Non-small cell lung cancer                               |                                               | 39            | P-LCH                 | No    | Development of chronic productive cough                                | Smoking cessation/ TKI inhibitor                                           |
| 1                                  | NE                             | Non-small cell lung cancer                               | Serous ovarian carcinoma, Pulmonary carcinoma | 67            | P-LCH                 | No    | Incidental nodule on follow up CXR after respiratory illness           | Smoking cessation                                                          |
| 10                                 | NE                             | Paget disease of the breast                              |                                               | 57            | P-LCH                 | No    | Unilateral bloody nipple discharge                                     | Smoking reduction/ PO steroid                                              |
| 91                                 | NE                             | Ductal carcinoma of the breast                           | Li Fraumeni Syndrome                          | 29            | P-LCH                 | No    | Breast pain w/ mass                                                    |                                                                            |
| 134                                | NE                             | Ductal carcinoma of the breast                           |                                               | 41            | P-LCH                 | No    | Breast cancer screening                                                | Smoking reduction/ PO steroid                                              |
| 265                                | Negative BRAF <sup>V600E</sup> | Papillary thyroid carcinoma                              |                                               | 34            | P-LCH                 | No    | Incidentally identified w/ LN bx in follow up PET-CT                   | Smoking cessation                                                          |
| 11                                 | NE                             | Colon adenocarcinoma                                     |                                               | 72            | MS                    | Yes   | Rectal bleeding                                                        | Resection/RT [death prior to systemic tx]                                  |
| 87                                 | NE                             | Hepatocellular carcinoma                                 |                                               | 56            | MS                    | No    | Development of clinical course consistent w/ cirrhosis                 | Vinblastine/Steroid; Cladribine                                            |
| 3                                  | NE                             | Prostate adenocarcinoma                                  |                                               | 58            | SU                    | No    | Evaluation of urinary hesitancy                                        | Surgical resection                                                         |
| 246                                | BRAF <sup>V600E</sup>          | Melanoma                                                 |                                               | 44            | MS                    | No    | Skin screening evaluation prior to TKI initiation                      | Resection; Dabrafenib                                                      |
| 78                                 | NE                             | Diffuse large B-Cell lymphoma, Melanoma                  |                                               | 67, 74        | MS                    | No    | Follow up CT after chemotherapy w/ developing sacral lesion            | Cladribine; R-CHOP [for DLBCL]                                             |
| 257                                | BRAF <sup>V600E</sup>          | MGUS / Multiple myeloma                                  | Essential thrombocythemia                     | 57            | SU                    | No    | Development of R hip pain w/ new bx of new lesion showing plasmacytoma | Hydroxyurea                                                                |
| 242                                | BRAF <sup>V600E</sup>          | Myelodysplastic syndrome (EB-1)                          |                                               | 38            | SsM                   | No    | Development of pancytopenia                                            | RT; Vinblastine/Steroid; Cytarabine; Hydroxyurea; Vemurafenib; MUD alloSCT |
| 209                                | Negative BRAF <sup>V600E</sup> | Myelodysplastic syndrome / Acute myeloid leukemia        |                                               | 61            | MS                    | No    | Development of pancytopenia                                            | Cladribine                                                                 |
| 52                                 | BRAF <sup>V600E</sup>          | Chronic myelomonocytic leukemia                          | Endometrial carcinoma                         | 75            | SsM                   | No    | Development of severe thrombocytopenia                                 | RT; PO steroid; Hydroxyurea                                                |
| 250                                | BRAF <sup>V600E</sup>          | Chronic myelomonocytic leukemia / Acute myeloid leukemia | Splenic marginal zone lymphoma                | 66            | MS                    | Yes   | Worsening monocytosis                                                  | Resection/Cladribine; RT; Vinblastine/Steroid;                             |

|     |                                |                        |  |    |       |     |                                                                           |            |
|-----|--------------------------------|------------------------|--|----|-------|-----|---------------------------------------------------------------------------|------------|
| 227 | BRAF <sup>V600E</sup>          | Acute myeloid leukemia |  | 47 | P-LCH | No  | Worsening cytopenias in setting of chronic kidney disease on hemodialysis | Cladribine |
| 45  | Negative BRAF <sup>V600E</sup> | Acute myeloid leukemia |  | 70 | MS    | Yes | Symptom development, not specified                                        | Cladribine |

*Concomitant malignancy*

|     |                                |                                |  |   |       |    |   |                            |
|-----|--------------------------------|--------------------------------|--|---|-------|----|---|----------------------------|
| 143 | NE                             | Small cell lung cancer         |  | - | P-LCH | No | - | Cytotoxic therapy for SCLC |
| 142 | NE                             | Ductal carcinoma of the breast |  | - | P-LCH | No | - | Smoking cessation          |
| 291 | Negative BRAF <sup>V600E</sup> | Papillary thyroid carcinoma    |  | - | MS    | No | - | -                          |
| 159 | IGH/BCL2 Fusion                | Follicular lymphoma            |  | - | MS    | No | - | Cladribine/RTX recommended |

*Prior malignancy before LCH*

|     |                                |                                         |                            |   |       |     |   |                                     |
|-----|--------------------------------|-----------------------------------------|----------------------------|---|-------|-----|---|-------------------------------------|
| 268 | BRAF <sup>V600E</sup>          | Non-small cell lung cancer              | Severe cervical dysplasia* | - | P-LCH | No  | - | Smoking cessation                   |
| 16  | NE                             | Ductal carcinoma of the breast          |                            | - | P-LCH | No  | - | Smoking cessation                   |
| 126 | NE                             | Ductal carcinoma of the breast          |                            | - | SU    | No  | - | Smoking cessation; Resection        |
| 31  | NE                             | Papillary thyroid carcinoma             |                            | - | MS    | No  | - | PO steroids; Cladribine             |
| 4   | NE                             | Esophageal adenocarcinoma               |                            | - | P-LCH | No  | - | Smoking reduction                   |
| 289 | Negative BRAF <sup>V600E</sup> | Pancreatic adenocarcinoma               |                            | - | SsM   | Yes | - | Cytarabine                          |
| 243 | Negative BRAF <sup>V600E</sup> | Rectal adenocarcinoma                   |                            | - | SU    | No  | - | Resection                           |
| 278 | Negative BRAF <sup>V600E</sup> | High-grade neuroendocrine tumor         |                            | - | P-LCH | No  | - | Smoking cessation                   |
| 8   | BRAF <sup>V600E</sup>          | Prostate adenocarcinoma                 |                            | - | MS    | Yes | - | Cladribine; Cytarabine; Vemurafenib |
| 236 | BRAF <sup>V600E</sup>          | Prostate adenocarcinoma                 |                            | - | MS    | Yes | - | Cladribine; Vemurafenib             |
| 180 | NE                             | Diffuse large B-Cell lymphoma, Melanoma |                            | - | P-LCH | No  | - | Smoking reduction                   |
| 295 | Negative BRAF <sup>V600E</sup> | Melanoma                                |                            | - | SsM   | No  | - | -                                   |

|     |    |                            |   |       |    |   |                               |
|-----|----|----------------------------|---|-------|----|---|-------------------------------|
| 56  | NE | Testicular germ cell tumor | - | P-LCH | No | - | Smoking cessation recommended |
| 151 | NE | Classical Hodgkin lymphoma | - | SU    | No | - | Cytotoxic therapy for HL      |

\* Developed after diagnosis of Langerhans cell histiocytosis (LCH)

**Supplementary Table 3. Molecular features of second primary cancers and LCH among those with available data**

| Second cancer      | LCH BRAF V600E status | Second cancer BRAF V600E status | Other molecular findings in second cancer                                                                                                          | Other molecular findings in LCH  |
|--------------------|-----------------------|---------------------------------|----------------------------------------------------------------------------------------------------------------------------------------------------|----------------------------------|
| Thyroid            | Neg                   | Neg                             | -                                                                                                                                                  |                                  |
| Malignant melanoma | Pos                   | Neg                             | -                                                                                                                                                  |                                  |
| Breast cancer      | -                     | -                               | TP53 mutated                                                                                                                                       |                                  |
| Multiple myeloma   | Pos                   | Neg                             |                                                                                                                                                    |                                  |
| MDS                | Neg                   | Neg                             | ASXL1: c.2483del; p.Gly828Alafs*10 (34%), IDH2: c.419G>A; p.Arg140Gln (49%), JAK2: c.1849G>T; p.Val617Phe (17%), SRSF2: c.284C>G; p.Pro95Arg (49%) |                                  |
| AML                | Neg                   | Neg                             | ASXL1: c.2483del; p.Gly828Alafs*10 (34%), IDH2: c.419G>A; p.Arg140Gln (49%), JAK2: c.1849G>T; p.Val617Phe (17%), SRSF2: c.284C>G; p.Pro95Arg (49%) | SRSF2 c.284C>G; p.Pro95Arg (26%) |
| CMML               | Pos                   | Neg                             | TET2 c.3223_3226delGATA p.L1074fs* (44.2%), TET2 c.388G>T p.E130* (44.6%).                                                                         |                                  |
| CMML→AML           | Pos                   | Not done                        | ASXL1 c.2060_2061del; p.Cys687Tyrf*30 (43%), IDH2 c.419G>A; p.Arg140Gln (47%), SRSF2 c.284C>A; p.Pro95His (47%)                                    |                                  |
| AML                | Not done              | Not available                   | NMP1, DMT3A, TET2 mutation by notes, report not available                                                                                          |                                  |

**Supplementary Table 4. Cases ascribed as LCH-associated deaths.**

| <b>Patient ID</b> | <b>Description</b>                                                                                                                 | <b>Cause of Death</b>                                                  | <b>LCH subtype at diagnosis</b> |
|-------------------|------------------------------------------------------------------------------------------------------------------------------------|------------------------------------------------------------------------|---------------------------------|
| <b>8</b>          | LCH due to Involvement of skin, lymph nodes, spleen, lungs, CNS and pituitary causing progressive cognitive and functional decline | LCH (transitioned to hospice)                                          | RO+                             |
| <b>12</b>         | Acute on chronic hypoxemic and hypercapnic respiratory failure in s/o of progressive LCH and severe pulmonary HTN                  | Resp failure due to progressive pulm LCH w/ pulm HTN (comfort care)    | Single-system pulmonary         |
| <b>15</b>         | LCH-associated DIC and multi-organ failure                                                                                         | DIC and multi-organ failure from LCH (comfort care)                    | RO+                             |
| <b>22</b>         | Hepatic and renal failure in s/o progressive LCH & secondary primary sclerosing cholangitis                                        | Liver and kidney failure secondary to LCH with secondary PSC (hospice) | RO+                             |
| <b>40</b>         | Severely reduced pulmonary function due to P-LCH                                                                                   | Progressive respiratory failure                                        | Single-system pulmonary         |
| <b>61</b>         | Langerhans cell histiocytosis and secondary pulmonary artery hypertension (severe)                                                 | Progressive respiratory failure                                        | Single-system pulmonary         |
| <b>69</b>         | Multisystem LCH with acute illness, died within 2 months of starting cladribine                                                    | Rapidly progressive LCH with organ failure                             | RO+                             |
| <b>83</b>         | Severely reduced pulmonary function due to P-LCH                                                                                   | Progressive respiratory failure                                        | Single-system pulmonary         |

|            |                                                                                                                                          |                                                              |          |
|------------|------------------------------------------------------------------------------------------------------------------------------------------|--------------------------------------------------------------|----------|
| <b>102</b> | LCH progression causing significant adenopathy and electrolyte disturbance ( hyponatremia and hypokalemia) , bilateral pleural effusions | Progressive LCH                                              | MS/MF    |
| <b>145</b> | Progression of LCH causing pan hypopituitarism and DVT/PE                                                                                | Rapidly progressive LCH with organ failure                   | MS/MF    |
| <b>159</b> | Multi-system LCH with concomitant indolent follicular lymphoma. Died within 2 months of initiation of cladribine                         | Rapidly progressive LCH with organ failure                   | MS/MF    |
| <b>170</b> | LCH of skull progressing through local therapies (surgery + radiation)                                                                   | Progressive LCH to multi-system disease, multi-organ failure | Unifocal |
| <b>236</b> | Multi-system LCH progressive after systemic chemotherapy. Concomitant MDS and prostate cancer with minimal disease burden.               | Progressive LCH (transitioned to hospice)                    | RO+      |

**Supplementary Figure 2. Kaplan-Meier analysis of PFS by classification as proposed by the adult LCH consensus recommendations.**

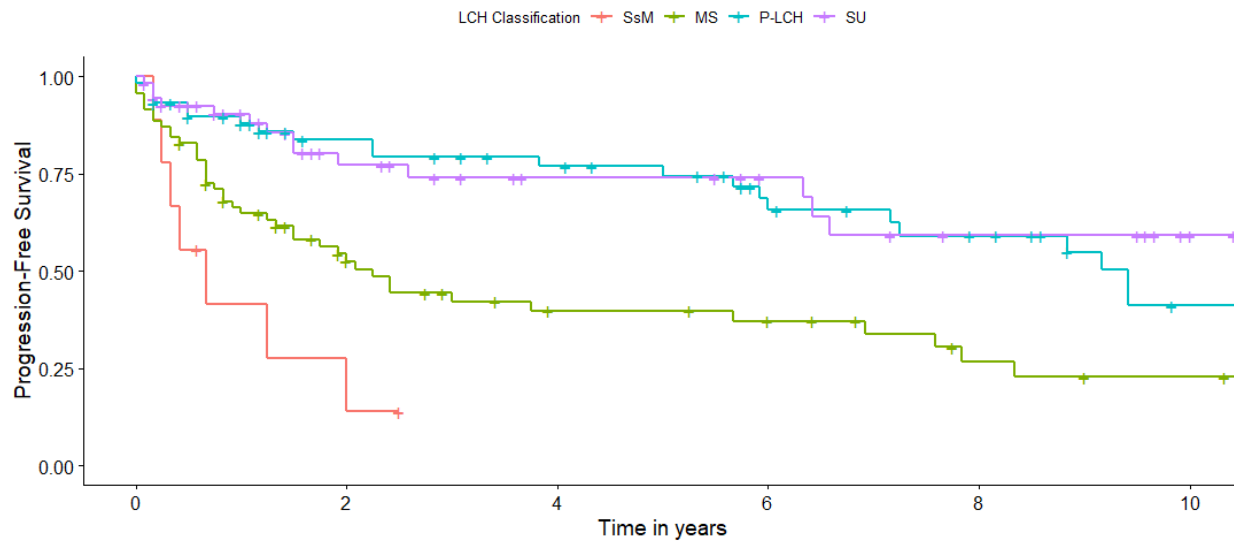

As compared to Unifocal LCH (SU):

- Multifocal (ssM) disease HR 7.1807; p=0.000031
- Single-system Pulmonary LCH HR 1.2601; p=0.495863
- Multisystem (MS) disease HR 2.9065; p=0.000576



**Supplementary Figure 3. Kaplan-Meier analysis of PFS by a) Unifocal bone disease vs. unifocal non-bone LCH, and b) multifocal bone vs. multifocal non-bone LCH**

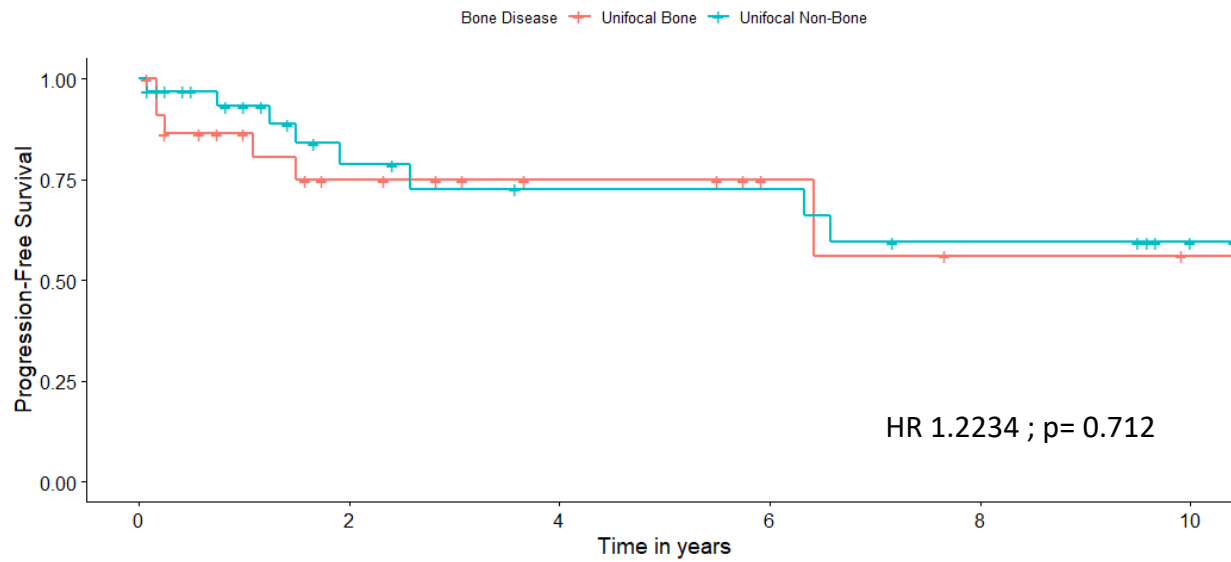

a)

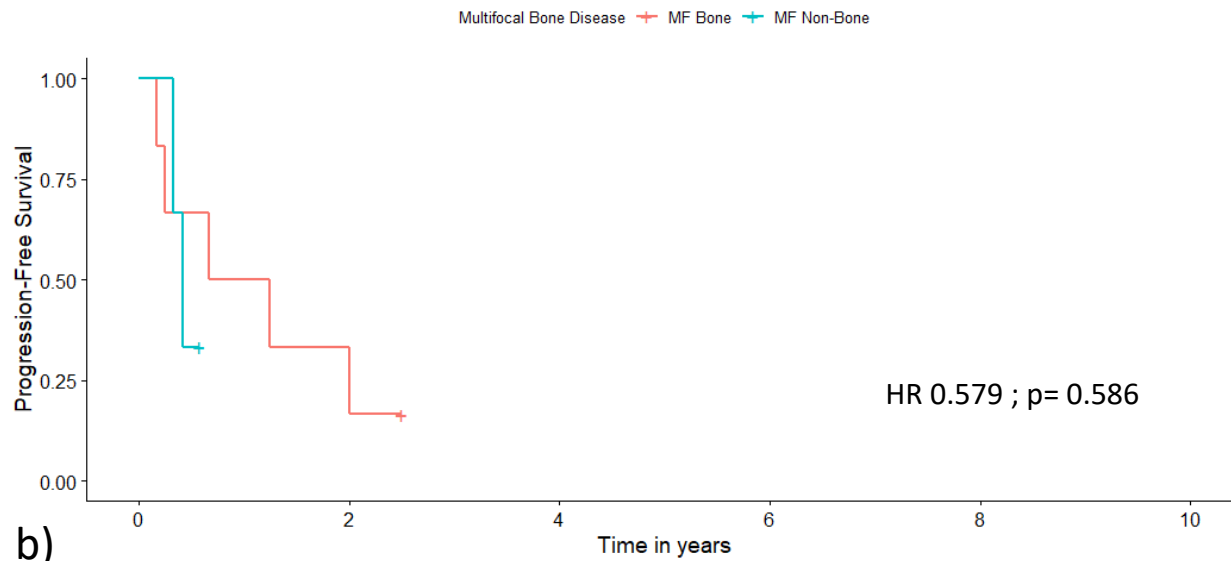

b)

**Supplementary Figure 4. Kaplan-Meier analysis of PFS by a) all insurance statuses (p>0.05), and b) private vs. uninsured**

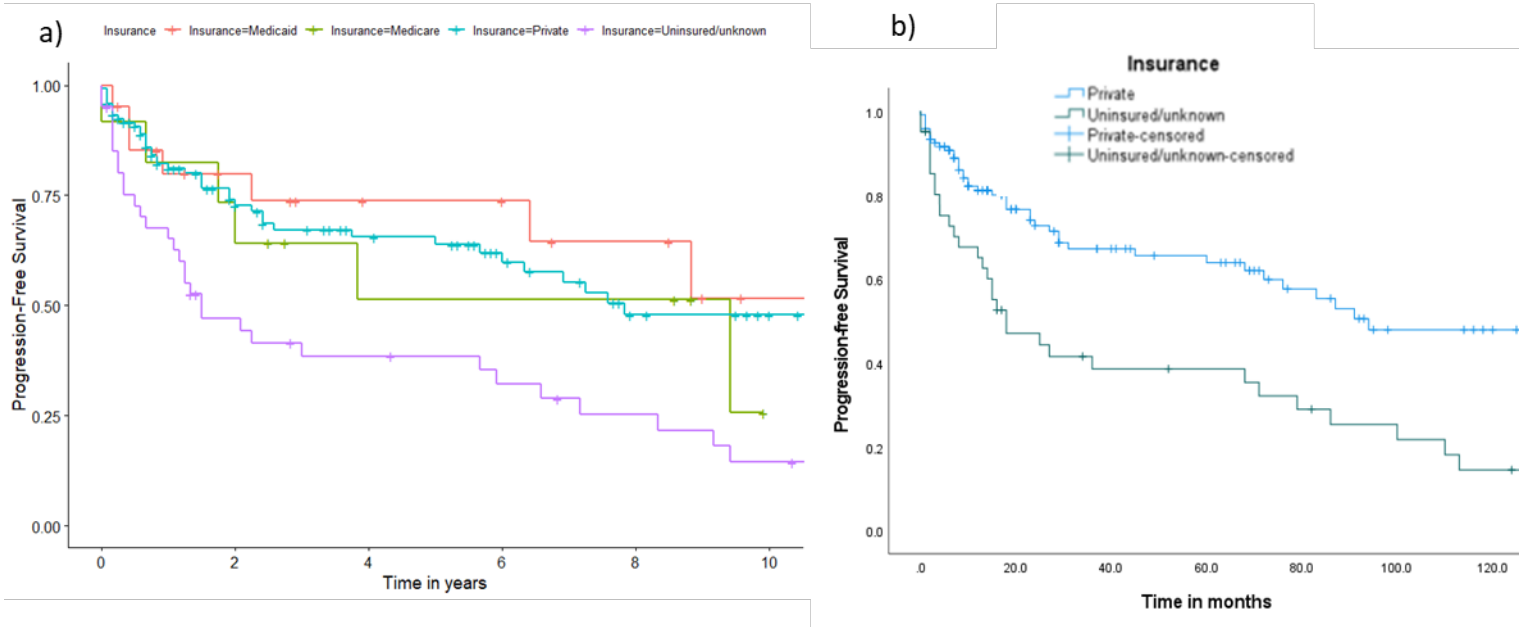

**Supplementary Figure 5. Cumulative incidence of mortality after a 5-year landmark of diagnosis**

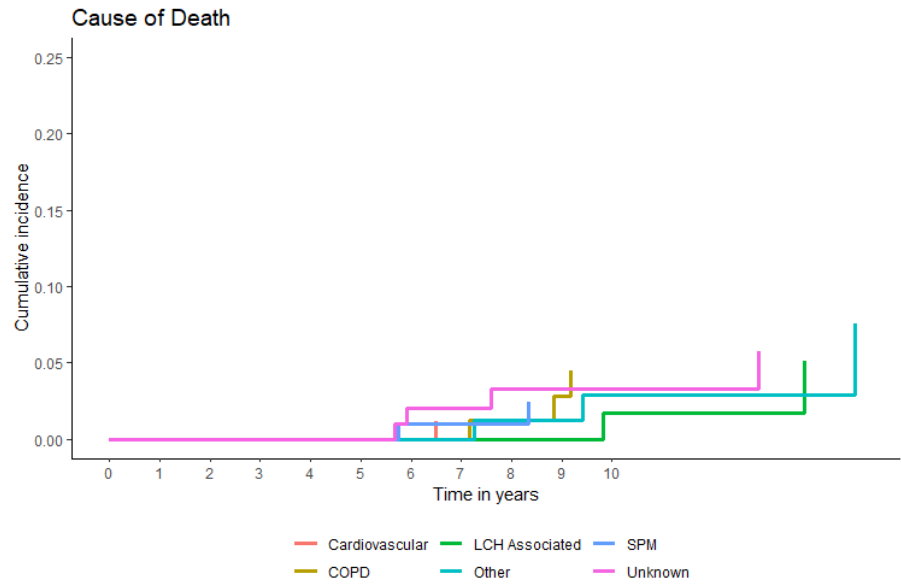

Supplement: BLOODA_ADV-2023-010706-mmc1.pdf [file BLOODA_ADV-2023-010706-mmc1.pdf]
